# Supplementary material for: Unravelling thermal stress due to thermal expansion mismatch in metal–organic frameworks for methane storage
Source: Royal Society of Chemistry journal article supplement (doi:10.1039/d0ta09462e), 2021-01-01
Supplement: d0ta09462e2.pdf [file d0ta09462e2.pdf]

# Unravelling thermal stress due to thermal expansion mismatch in metal-organic frameworks for methane storage

Jelle Wieme and Veronique Van Speybroeck\*

*Center for Molecular Modeling, Ghent University, Tech Lane Ghent Science Park Campus A,  
Technologiepark 46, 9052 Zwijnaarde, Belgium*

E-mail: Veronique.VanSpeybroeck@UGent.be

---

|                                              |             |
|----------------------------------------------|-------------|
| <b>S1 Materials</b>                          | <b>S-2</b>  |
| <b>S2 Extra figures and tables</b>           | <b>S-5</b>  |
| <b>S3 Force field simulations</b>            | <b>S-11</b> |
| S3.1 First-principles cluster data . . . . . | S-11        |
| S3.2 Covalent interactions . . . . .         | S-12        |
| S3.3 Electrostatic interactions . . . . .    | S-13        |
| S3.4 Van der Waals interactions . . . . .    | S-13        |
| <b>References</b>                            | <b>S-14</b> |

---

# S1 Materials

System-specific force fields were derived for various MOFs as listed in Tables S1, S2, S3 and S4.

Table S1: Al-based metal-organic frameworks under study.

| MOF                       | $\rho$<br>( $\text{kg}\cdot\text{m}^{-3}$ ) | ASA<br>( $\text{m}^2\cdot\text{g}^{-1}$ ) | Void fraction<br>(%) | LCD<br>( $\text{\AA}$ ) | $\alpha_0$<br>( $\text{MK}^{-1}$ ) | $\beta_0$<br>(GPa) | $\gamma$<br>( $\text{MPa}\cdot\text{K}^{-1}$ ) |
|---------------------------|---------------------------------------------|-------------------------------------------|----------------------|-------------------------|------------------------------------|--------------------|------------------------------------------------|
| Al-soc-MOF-1 <sup>1</sup> | 343                                         | 5010                                      | 79                   | 15.9                    | -13.3                              | 8.9                | -0.118                                         |
| MOF-519 <sup>2</sup>      | 894                                         | 1163                                      | 32                   | 8.7                     | -14.9                              | 10.2               | -0.152                                         |
| MOF-520 <sup>2</sup>      | 529                                         | 3793                                      | 69                   | 10.1                    | -12.8                              | 7.8                | -0.100                                         |
| MOF-520-BPDC <sup>3</sup> | 605                                         | 3158                                      | 62                   | 10.4                    | -10.3                              | 13.0               | -0.133                                         |

Table S2: Zn-based metal-organic frameworks under study.

| MOF                            | $\rho$<br>( $\text{kg}\cdot\text{m}^{-3}$ ) | ASA<br>( $\text{m}^2\cdot\text{g}^{-1}$ ) | Void fraction<br>(%) | LCD<br>( $\text{\AA}$ ) | $\alpha_0$<br>( $\text{MK}^{-1}$ ) | $\beta_0$<br>(GPa) | $\gamma$<br>( $\text{MPa}\cdot\text{K}^{-1}$ ) |
|--------------------------------|---------------------------------------------|-------------------------------------------|----------------------|-------------------------|------------------------------------|--------------------|------------------------------------------------|
| IRMOF-8 <sup>4</sup>           | 424                                         | 4662                                      | 81                   | 17.7                    | -40.3                              | 4.9                | -0.196                                         |
| IRMOF-10 <sup>4</sup>          | 304                                         | 5244                                      | 86                   | 21.5                    | -47.6                              | 4.9                | -0.233                                         |
| MOF-5 (IRMOF-1) <sup>5</sup>   | 555                                         | 3993                                      | 77                   | 15.5                    | -36.7                              | 11.1               | -0.408                                         |
| MOF-177 <sup>6</sup>           | 406                                         | 4895                                      | 80                   | 11.9                    | -30.3                              | 6.2                | -0.187                                         |
| MOF-180 <sup>7</sup>           | 242                                         | 6358                                      | 87                   | 16.5                    | -131.4                             | 1.4                | -0.179                                         |
| MOF-200 <sup>7</sup>           | 204                                         | 6335                                      | 89                   | 17.9                    | -39.1                              | 3.7                | -0.145                                         |
| MOF-205 (DUT-6) <sup>7,8</sup> | 361                                         | 5211                                      | 83                   | 23.1                    | -29.3                              | 7.4                | -0.218                                         |
| MOF-210 <sup>7</sup>           | 223                                         | 6028                                      | 88                   | 31.6                    | -96.6                              | 1.6                | -0.155                                         |
| MOF-905 <sup>9</sup>           | 500                                         | 4024                                      | 79                   | 19.8                    | -106.9                             | 3.9                | -0.415                                         |
| MOF-950 <sup>9</sup>           | 550                                         | 4155                                      | 76                   | 9.8                     | -26.0                              | 9.2                | -0.239                                         |
| MUF-7 <sup>10</sup>            | 364                                         | 4863                                      | 81                   | 22.0                    | -25.2                              | 6.8                | -0.171                                         |
| UMCM-1 <sup>11</sup>           | 366                                         | 4587                                      | 83                   | 25.2                    | -40.9                              | 5.9                | -0.240                                         |
| UMCM-8 <sup>12</sup>           | 490                                         | 4337                                      | 79                   | 16.2                    | -26.3                              | 6.3                | -0.166                                         |
| UMCM-9 <sup>12</sup>           | 362                                         | 5009                                      | 83                   | 19.1                    | -37.5                              | 4.7                | -0.175                                         |

Table S3: Zr-based metal-organic frameworks under study.

| MOF                     | $\rho$<br>( $\text{kg}\cdot\text{m}^{-3}$ ) | ASA<br>( $\text{m}^2\cdot\text{g}^{-1}$ ) | Void fraction<br>(%) | LCD<br>( $\text{\AA}$ ) | $\alpha_0$<br>( $\text{MK}^{-1}$ ) | $\beta_0$<br>(GPa) | $\gamma$<br>( $\text{MPa}\cdot\text{K}^{-1}$ ) |
|-------------------------|---------------------------------------------|-------------------------------------------|----------------------|-------------------------|------------------------------------|--------------------|------------------------------------------------|
| NU-800 <sup>13</sup>    | 567                                         | 4458                                      | 75                   | 13.9                    | -80.6                              | 4.1                | -0.331                                         |
| pbz-MOF-1 <sup>14</sup> | 630                                         | 3360                                      | 66                   | 14.6                    | -10.6                              | 10.8               | -0.114                                         |

Table S4: Cu-based metal-organic frameworks under study.

| MOF                                 | $\rho$<br>( $\text{kg}\cdot\text{m}^{-3}$ ) | ASA<br>( $\text{m}^2\cdot\text{g}^{-1}$ ) | Void fraction<br>(%) | LCD<br>( $\text{\AA}$ ) | $\alpha_0$<br>( $\text{MK}^{-1}$ ) | $\beta_0$<br>(GPa) | $\gamma$<br>( $\text{MPa}\cdot\text{K}^{-1}$ ) |
|-------------------------------------|---------------------------------------------|-------------------------------------------|----------------------|-------------------------|------------------------------------|--------------------|------------------------------------------------|
| FJI-H5 <sup>15</sup>                | 415                                         | 4385                                      | 80                   | 22.1                    | -18.9                              | 1.7                | -0.031                                         |
| HKUST-1 <sup>16</sup>               | 851                                         | 2229                                      | 66                   | 13.5                    | -9.7                               | 20.7               | -0.199                                         |
| HNUST-2 <sup>17</sup>               | 555                                         | 4604                                      | 73                   | 11.5                    | -32.5                              | 4.7                | -0.152                                         |
| MFM-112 <sup>18</sup>               | 475                                         | 4200                                      | 77                   | 22.7                    | -14.4                              | 11.6               | -0.167                                         |
| MOF-505 (NOTT-100) <sup>19,20</sup> | 888                                         | 2422                                      | 64                   | 10.2                    | -10.8                              | 20.2               | -0.219                                         |
| NJU-Bai 10 <sup>21</sup>            | 652                                         | 3404                                      | 71                   | 12.9                    | -13.5                              | 6.3                | -0.085                                         |
| NJU-Bai 17 <sup>22</sup>            | 789                                         | 2942                                      | 67                   | 10.2                    | -12.1                              | 15.5               | -0.187                                         |
| NJU-Bai 19 <sup>23</sup>            | 680                                         | 3293                                      | 68                   | 11.2                    | -9.7                               | 13.9               | -0.135                                         |
| NJU-Bai 41 <sup>24</sup>            | 708                                         | 2902                                      | 65                   | 11.9                    | -9.6                               | 9.9                | -0.095                                         |
| NJU-Bai 42 <sup>24</sup>            | 664                                         | 3483                                      | 71                   | 11.8                    | -7.5                               | 11.1               | -0.083                                         |
| NOTT-101 <sup>25</sup>              | 657                                         | 3384                                      | 71                   | 11.7                    | -10.1                              | 14.3               | -0.145                                         |
| NOTT-108 <sup>25</sup>              | 749                                         | 2730                                      | 66                   | 11.6                    | -7.7                               | 15.4               | -0.117                                         |
| NU-111 <sup>26</sup>                | 390                                         | 4704                                      | 80                   | 23.4                    | -58.1                              | 5.7                | -0.330                                         |
| NU-125 <sup>27</sup>                | 550                                         | 3795                                      | 74                   | 19.9                    | -11.8                              | 6.4                | -0.075                                         |
| NU-135 <sup>28</sup>                | 721                                         | 2803                                      | 62                   | 11.8                    | -9.2                               | 13.3               | -0.122                                         |
| NU-140 <sup>29</sup>                | 367                                         | 4979                                      | 81                   | 25.0                    | -17.1                              | 2.0                | -0.035                                         |
| PCN-11 <sup>30</sup>                | 714                                         | 3112                                      | 70                   | 10.7                    | -17.8                              | 18.0               | -0.320                                         |
| PCN-14 <sup>31</sup>                | 786                                         | 2353                                      | 56                   | 11.7                    | -4.8                               | 14.5               | -0.070                                         |
| PCN-61 <sup>32</sup>                | 537                                         | 3795                                      | 74                   | 20.2                    | -37.0                              | 10.6               | -0.392                                         |
| PCN-66 <sup>32</sup>                | 413                                         | 4726                                      | 80                   | 22.9                    | -50.9                              | 5.4                | -0.274                                         |
| PCN-68 (NOTT-116) <sup>33,34</sup>  | 355                                         | 5113                                      | 81                   | 25.7                    | -42.0                              | 6.6                | -0.276                                         |
| PCN-610 (NU-100) <sup>33,35</sup>   | 274                                         | 5876                                      | 86                   | 28.9                    | -107.4                             | 1.6                | -0.171                                         |
| UTSA-20 <sup>36</sup>               | 885                                         | 2085                                      | 58                   | 10.4                    | -9.7                               | 8.0                | -0.078                                         |
| UTSA-61 <sup>37</sup>               | 690                                         | 2834                                      | 68                   | 17.5                    | -17.7                              | 17.9               | -0.318                                         |
| UTSA-76 <sup>38</sup>               | 669                                         | 3288                                      | 71                   | 11.5                    | -7.8                               | 13.5               | -0.106                                         |
| UTSA-80 <sup>39</sup>               | 676                                         | 2837                                      | 64                   | 13.7                    | -17.2                              | 8.6                | -0.147                                         |
| UTSA-88 <sup>40</sup>               | 831                                         | 2412                                      | 62                   | 11.6                    | -9.9                               | 13.8               | -0.137                                         |
| UTSA-110 <sup>41</sup>              | 571                                         | 4021                                      | 74                   | 12.8                    | -15.8                              | 7.5                | -0.119                                         |
| ZJU-5 <sup>42</sup>                 | 664                                         | 3309                                      | 71                   | 11.6                    | -11.5                              | 14.6               | -0.167                                         |
| ZJU-32 <sup>43</sup>                | 420                                         | 4759                                      | 80                   | 16.2                    | -23.0                              | 6.3                | -0.146                                         |
| ZJU-35 <sup>44</sup>                | 630                                         | 3190                                      | 74                   | 15.0                    | -13.5                              | 12.8               | -0.173                                         |
| ZJU-36 <sup>44</sup>                | 489                                         | 3948                                      | 78                   | 17.5                    | -38.6                              | 3.0                | -0.146                                         |

## S2 Extra figures and tables

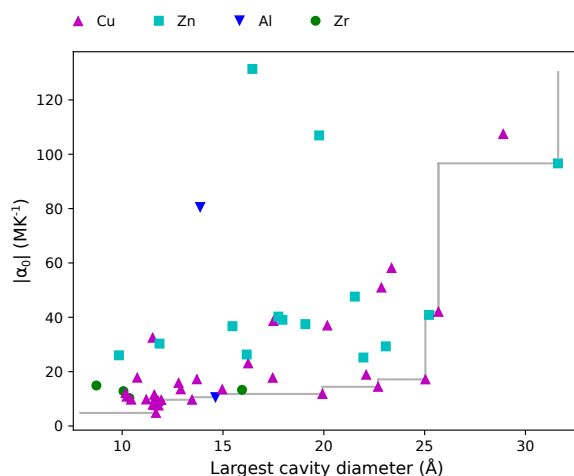

Figure S1: The magnitude of the thermal expansion coefficient as a function of the largest cavity diameter. A Pareto front where the thermal expansion coefficient is minimized and the largest cavity diameter is maximised is shown.

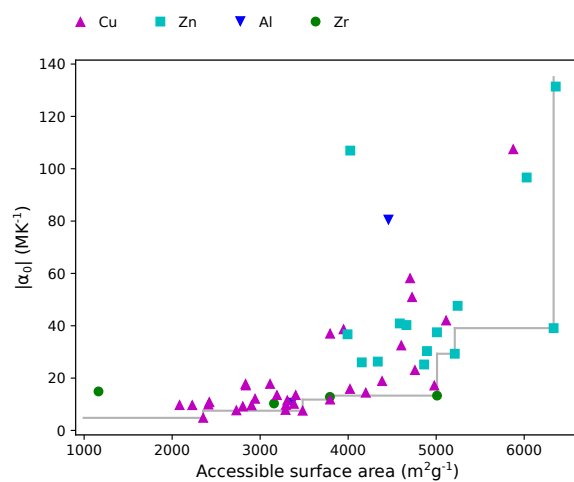

Figure S2: The magnitude of the thermal expansion coefficient as a function of the accessible surface area. A Pareto front where the thermal expansion coefficient is minimized and the accessible surface area is maximised is shown.

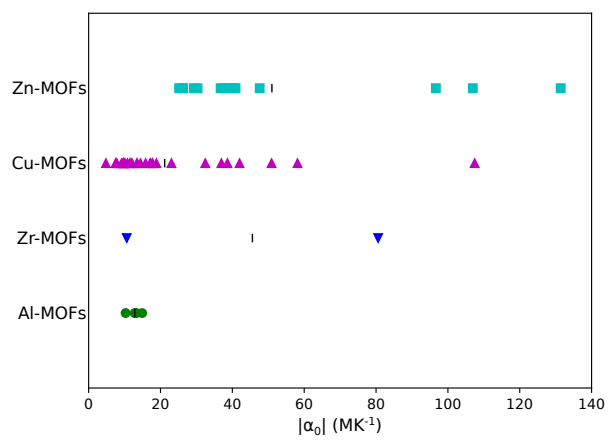

Figure S3: Influence of the inorganic building block on the thermal expansion coefficient. The vertical black line indicates the average per inorganic building block.

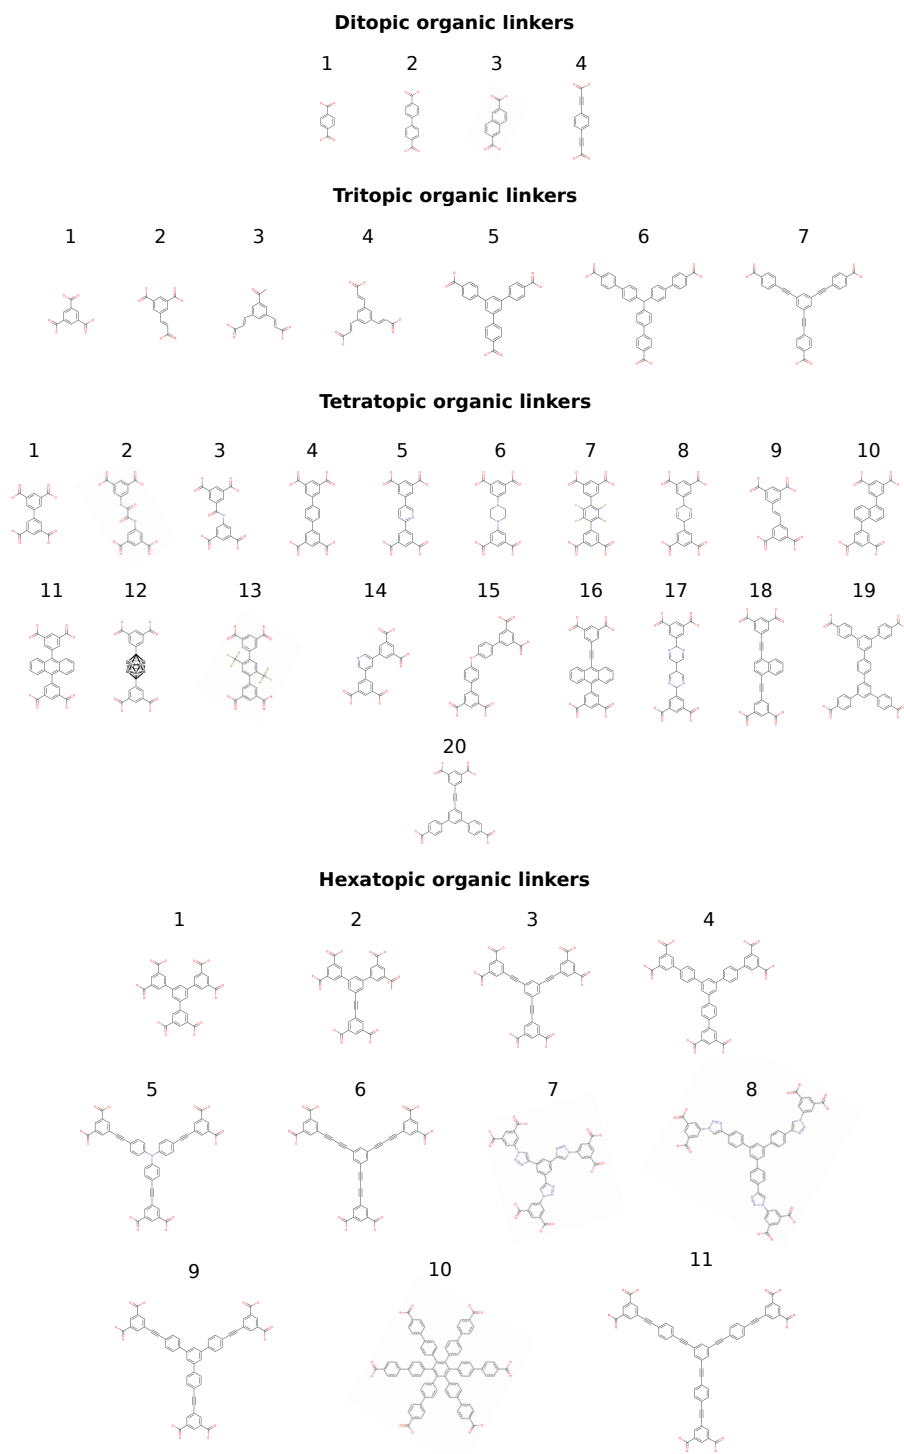

Figure S4: Overview of the organic linkers used in this work. The hydrogens are implicit.

Table S5: Organic linkers of the Al-based metal-organic frameworks under study (Figure S4).

| MOF                       | Ditopic | Tritopic | Tetratopic | Hexatopic |
|---------------------------|---------|----------|------------|-----------|
| Al-soc-MOF-1 <sup>1</sup> | -       | -        | 19         | -         |
| MOF-519 <sup>2</sup>      | -       | 5        | -          | -         |
| MOF-520 <sup>2</sup>      | -       | 5        | -          | -         |
| MOF-520-BPDC <sup>3</sup> | 2       | 5        | -          | -         |

Table S6: Organic linkers of the Zn-based metal-organic frameworks under study (Figure S4).

| MOF                            | Ditopic | Tritopic | Tetratopic | Hexatopic |
|--------------------------------|---------|----------|------------|-----------|
| IRMOF-8 <sup>4</sup>           | 3       | -        | -          | -         |
| IRMOF-10 <sup>4</sup>          | 2       | -        | -          | -         |
| MOF-5 (IRMOF-1) <sup>5</sup>   | 1       | -        | -          | -         |
| MOF-177 <sup>6</sup>           | -       | 5        | -          | -         |
| MOF-180 <sup>7</sup>           | -       | 7        | -          | -         |
| MOF-200 <sup>7</sup>           | -       | 6        | -          | -         |
| MOF-205 (DUT-6) <sup>7,8</sup> | 3       | 5        | -          | -         |
| MOF-210 <sup>7</sup>           | 2       | 7        | -          | -         |
| MOF-905 <sup>9</sup>           | 1       | 4        | -          | -         |
| MOF-950 <sup>9</sup>           | -       | 4        | -          | -         |
| MUF-7 <sup>10</sup>            | 1, 2    | 5        | -          | -         |
| UMCM-1 <sup>11</sup>           | 1       | 5        | -          | -         |
| UMCM-8 <sup>12</sup>           | 1, 3    | -        | -          | -         |
| UMCM-9 <sup>12</sup>           | 2, 3    | -        | -          | -         |



Table S7: Organic linkers of the Zr-based metal-organic frameworks under study (Figure S4).

| MOF                     | Ditopic | Tritopic | Tetratopic | Hexatopic |
|-------------------------|---------|----------|------------|-----------|
| NU-800 <sup>13</sup>    | 4       | -        | -          | -         |
| pbz-MOF-1 <sup>14</sup> | -       | -        | -          | 10        |

Table S8: Organic linkers of the Cu-based metal-organic frameworks under study (Figure S4).

| MOF                                 | Ditopic | Tritopic | Tetratopic | Hexatopic |
|-------------------------------------|---------|----------|------------|-----------|
| FJI-H5 <sup>15</sup>                | -       | -        | 15         | -         |
| HKUST-1 <sup>16</sup>               | -       | 1        | -          | -         |
| HNUST-2 <sup>17</sup>               | -       | -        | 18         | -         |
| MFM-112 <sup>18</sup>               | -       | -        | -          | 4         |
| MOF-505 (NOTT-100) <sup>19,20</sup> | -       | -        | 1          | -         |
| NJU-Bai 10 <sup>21</sup>            | -       | -        | 14         | -         |
| NJU-Bai 17 <sup>22</sup>            | -       | -        | 3          | -         |
| NJU-Bai 19 <sup>23</sup>            | -       | -        | 6          | -         |
| NJU-Bai 41 <sup>24</sup>            | -       | -        | 10         | -         |
| NJU-Bai 42 <sup>24</sup>            | -       | -        | 2          | -         |
| NOTT-101 <sup>25</sup>              | -       | -        | 4          | -         |
| NOTT-108 <sup>25</sup>              | -       | -        | 7          | -         |
| NU-111 <sup>26</sup>                | -       | -        | -          | 6         |
| NU-125 <sup>27</sup>                | -       | -        | -          | 7         |
| NU-135 <sup>28</sup>                | -       | -        | 12         | -         |
| NU-140 <sup>29</sup>                | -       | -        | -          | 8         |
| PCN-11 <sup>30</sup>                | -       | -        | 9          | -         |
| PCN-14 <sup>31</sup>                | -       | -        | 11         | -         |
| PCN-61 <sup>32</sup>                | -       | -        | -          | 3         |
| PCN-66 <sup>32</sup>                | -       | -        | -          | 5         |
| PCN-68 (NOTT-116) <sup>33,34</sup>  | -       | -        | -          | 9         |
| PCN-610 (NU-100) <sup>33,35</sup>   | -       | -        | -          | 11        |
| UTSA-20 <sup>36</sup>               | -       | -        | -          | 1         |
| UTSA-61 <sup>37</sup>               | -       | -        | -          | 2         |
| UTSA-76 <sup>38</sup>               | -       | -        | 8          | -         |
| UTSA-80 <sup>39</sup>               | -       | -        | 16         | -         |
| UTSA-88 <sup>40</sup>               | -       | -        | 13         | -         |
| UTSA-110 <sup>41</sup>              | -       | -        | 17         | -         |
| ZJU-5 <sup>42</sup>                 | -       | -        | 5          | -         |
| ZJU-32 <sup>43</sup>                | -       | -        | 20         | -         |
| ZJU-35 <sup>44</sup>                | -       | 2        | -          | -         |
| ZJU-36 <sup>44</sup>                | -       | 3        | -          | -         |

## S3 Force field simulations

The first-principles force fields used to model the systems under study are derived using QuickFF.<sup>45,46</sup> Within this protocol, the quantum mechanical potential energy surface (PES) is approximated by a sum of analytical functions of the nuclear coordinates that describe the covalent (cov) and noncovalent (noncov) interactions. The latter are composed of electrostatic and van der Waals interactions. The force field and a structure are added for every MOF in Yaff-format as supplementary information.

$$V^{FF} = \underbrace{V_{bond} + V_{bend} + V_{oopd} + V_{torsion} + V_{cross}}_{V_{cov}} + \underbrace{V_{ei} + V_{vdW}}_{V_{noncov}}. \quad (\text{S3.1})$$

### S3.1 First-principles cluster data

The required first-principles cluster data for the determination of the covalent terms in the force field are generated with Gaussian 16<sup>47</sup> using the B3LYP<sup>48</sup> exchange-correlation functional. A 6-311G(*d,p*) basis set<sup>49</sup> is used for all row 1, row 2 and row 3 atoms, together with the LanL2DZ basis set for Zn and Zr.<sup>50</sup> The atomic charges are derived with the Minimal Basis Iterative Stockholder (MBIS) partitioning scheme<sup>51</sup> from the all-electron density obtained with Gaussian 16. The atomic charges of the Zn- and Zr-clusters are obtained from the PBE<sup>52</sup> all-electron density computed with GPAW<sup>53</sup>. The force field parameters for the atom types overlapping in the organic linker and the inorganic brick cluster models were averaged.

### S3.2 Covalent interactions

The covalent interactions – which mimic the chemical bonds between the atoms – are approximated by different terms as a function of the internal coordinates (bonds, bends, out-of-plane distances, and dihedrals). The unknown force field parameters are fitted following the QuickFF procedure.<sup>45</sup> We use an extended version<sup>46</sup> to include anharmonic bond and bend terms,<sup>54</sup> which are important when modeling nuclear quantum effects and the thermal expansion of MOFs.<sup>55,56</sup> The anharmonic bond and bend terms are given by:

$$V_{\text{bond}}^{ij} = \frac{K_{ij}}{2} (r_{ij} - r_{0,ij})^2 \left[ 1 - \alpha (r_{ij} - r_{0,ij}) + \frac{7}{12} \cdot \alpha^2 \cdot (r_{ij} - r_{0,ij})^2 \right], \quad (\text{S3.2})$$

$$V_{\text{bend}}^{ijk} = \frac{K_{ijk}}{2} (\theta_{ijk} - \theta_{0,ijk})^2 \left[ 1 - a_1 (\theta_{ijk} - \theta_{0,ijk}) + a_2 \cdot (\theta_{ijk} - \theta_{0,ijk})^2 - a_3 \cdot (\theta_{ijk} - \theta_{0,ijk})^3 + a_4 (\theta_{ijk} - \theta_{0,ijk})^4 \right], \quad (\text{S3.3})$$

with  $\alpha = 2.55 \text{ \AA}^{-1}$ ,  $a_1 = 0.014 \text{ deg}^{-1}$ ,  $a_2 = 5.6 \cdot 10^{-5} \text{ deg}^{-2}$ ,  $a_3 = 7 \cdot 10^{-7} \text{ deg}^{-3}$ , and  $a_4 = 2.2 \cdot 10^{-8} \text{ deg}^{-4}$ . We also add cross terms between the bonds and bends to improve the correspondence with the first-principles data.<sup>55</sup> The included cross terms are:

- angle stretch-stretch terms (ASS) between neighboring bonds, i.e. part of the same angle
- angle stretch-angle terms (ASA).

The mathematical expression of these terms is given by

$$V_{\text{ASS}}^{ijk} = K_{ijk}^{\text{ASS}} (r_{ij} - r_{0,ij}) (r_{jk} - r_{0,jk}) \quad (\text{S3.4})$$

$$V_{\text{ASA}}^{ijk} = \left[ K_{ijk}^{\text{ASA1}} (r_{ij} - r_{0,ij}) + K_{ijk}^{\text{ASA2}} (r_{jk} - r_{0,jk}) \right] (\theta_{ijk} - \theta_{0,ijk}). \quad (\text{S3.5})$$

The out-of-plane distances are described using a harmonic potential:

$$V_{\text{oopd}}^{ijkl} = \frac{K_{ijkl}}{2} (d_{ijkl} - d_{0,ijkl})^2. \quad (\text{S3.6})$$

This is a four-atom interaction, in which the internal coordinate is the distance between the central atom and the plane determined by its three neighbors. The fourth covalent

term is the dihedral energy term. Here, a cosine term is used as a function of the dihedral angle, including the multiplicity  $m_\phi$  of the dihedral angle:

$$V_{torsion}^{ijkl} = \frac{K_{ijkl}}{2} [1 - \cos(m_\phi(\phi_{ijkl} - \phi_{0,ijkl}))]. \quad (\text{S3.7})$$

The unknown parameters in all terms (force constants, rest values, and multiplicities) in the covalent energy expression can be estimated directly with QuickFF.

### S3.3 Electrostatic interactions

The electrostatic interactions are modeled by a Coulomb interaction between Gaussian charge distributions,<sup>57</sup> which allows to include all pairwise interactions. The atomic charges  $q_i$  are derived with the Minimal Basis Iterative Stockholder (MBIS) partitioning scheme.<sup>51</sup>

$$V_{ei} = \frac{1}{2} \sum_{\substack{i,j=1 \\ (i \neq j)}} \frac{q_i q_j}{4\pi\epsilon_0 r_{ij}} \operatorname{erf}\left(\frac{r_{ij}}{d_{ij}}\right) \quad (\text{S3.8})$$

Gaussian charge distributions are used with a total charge  $q_i$  and radius  $d_i$ , centered on atom  $i$ . The mixed radius of the Gaussian charges,<sup>57</sup>  $d_{ij}$ , is given by  $\sqrt{d_i^2 + d_j^2}$ . The interaction depends on the distance  $r_{ij}$  between the two atoms.

### S3.4 Van der Waals interactions

The van der Waals interactions are described by the MM3-Buckingham model<sup>58,59</sup> up to a finite cutoff (12 Å) and are supplemented with tail corrections.<sup>60</sup>

$$V_{vdW} = \epsilon_{ij} \left[ 1.84 \cdot 10^5 \exp\left(-12 \frac{r}{\sigma_{ij}}\right) - 2.25 \left(\frac{\sigma_{ij}}{r}\right)^6 \right] \quad (\text{S3.9})$$

The two parameters  $\sigma_{ij}$  and  $\epsilon_{ij}$  are the equilibrium distance and the well depth of the potential. These parameters are typically determined with empirical mixing rules for the interaction between atom  $i$  and atom  $j$ :

$$\sigma_{ij} = \sigma_i + \sigma_j \quad \text{and} \quad \epsilon_{ij} = \sqrt{\epsilon_i \epsilon_j} \quad (\text{S3.10})$$

and these parameters were taken from the MM3 force field for every atom and are tabulated in Ref. 59. In MM3, the 1-2 and 1-3 interactions are discarded to avoid a strong overestimation of the repulsion terms.

## References

- (1) Alezi, D.; Belmabkhout, Y.; Suyetin, M.; Bhatt, P. M.; Weselinski, L. J.; Solovyeva, V.; Adil, K.; Spanopoulos, I.; Trikalitis, P. N.; Emwas, A.-H.; Eddaoudi, M. MOF Crystal Chemistry Paving the Way to Gas Storage Needs: Aluminum-Based soc-MOF for CH<sub>4</sub>, O<sub>2</sub>, and CO<sub>2</sub> Storage. *J. Am. Chem. Soc.* **2015**, *137*, 13308–13318.
- (2) Gándara, F.; Furukawa, H.; Lee, S.; Yaghi, O. M. High Methane Storage Capacity in Aluminum Metal-Organic Frameworks. *J. Am. Chem. Soc.* **2014**, *136*, 5271–5274.
- (3) Kapustin, E. A.; Lee, S.; Alshammari, A. S.; Yaghi, O. M. Molecular Retrofitting Adapts a Metal-Organic Framework to Extreme Pressure. *ACS Cent. Sci.* **2017**, *3*, 662–667.
- (4) Eddaoudi, M.; Kim, J.; Rosi, N.; Vodak, D.; Wachter, J.; O’Keeffe, M.; Yaghi, O. M. Systematic Design of Pore Size and Functionality in Isoreticular MOFs and Their Application in Methane Storage. *Science* **2002**, *295*, 469–472.
- (5) Li, H.; Eddaoudi, M.; O’Keeffe, M.; Yaghi, O. M. Design and Synthesis of an Exceptionally Stable and Highly Porous Metal-Organic Framework. *Nature* **1999**, *402*, 276–279.
- (6) Chae, H. K.; Siberio-Pérez, D. Y.; Kim, J.; Go, Y. B.; Eddaoudi, M.; Matzger, A. J.; O’Keeffe, M.; Yaghi, O. M. A Route to High Surface Area, Porosity and Inclusion of Large Molecules in Crystals. *Nature* **2004**, *427*, 523–527.
- (7) Furukawa, H.; Ko, N.; Go, Y. B.; Aratani, N.; Choi, S. B.; Choi, E.; Yazaydin, O. A.; Snurr, R. Q.; O’Keeffe, M.; Kim, J.; Yaghi, O. M. Ultrahigh Porosity in Metal-Organic Frameworks. *Science* **2010**, *329*, 424–428.

- (8) Klein, N.; Senkowska, I.; Gedrich, K.; Stoeck, U.; Henschel, A.; Mueller, U.; Kaskel, S. A Mesoporous Metal-Organic Framework. *Angew. Chem. Int. Ed.* **2009**, *48*, 9954–9957.
- (9) Jiang, J.; Furukawa, H.; Zhang, Y.-B.; Yaghi, O. M. High Methane Storage Working Capacity in Metal-Organic Frameworks with Acrylate Links. *J. Am. Chem. Soc.* **2016**, *138*, 10244–10251.
- (10) Liu, L.; Konstas, K.; Hill, M. R.; Telfer, S. G. Programmed Pore Architectures in Modular Quaternary Metal-Organic Frameworks. *J. Am. Chem. Soc.* **2013**, *135*, 17731–17734.
- (11) Koh, K.; Wong-Foy, A. G.; Matzger, A. J. A Crystalline Mesoporous Coordination Copolymer with High Microporosity. *Angew. Chem. Int. Ed.* **2008**, *47*, 677–680.
- (12) Koh, K.; Van Oosterhout, J. D.; Roy, S.; Wong-Foy, A. G.; Matzger, A. J. Exceptional surface area from coordination copolymers derived from two linear linkers of differing lengths. *Chem. Sci.* **2012**, *3*, 2429–2432.
- (13) Gomez-Cualdron, D. A.; Gutov, O. V.; Krungleviciute, V.; Borah, B.; Mondloch, J. E.; Hupp, J. T.; Yildirim, T.; Farha, O. K.; Snurr, R. Q. Computational Design of Metal-Organic Frameworks Based on Stable Zirconium Building Units for Storage and Delivery of Methane. *Chem. Mater.* **2014**, *26*, 5632–5639.
- (14) Alezi, D.; Spanopoulos, I.; Tsangarakis, C.; Shkurenko, A.; Adil, K.; Belmabkhout, Y.; O’Keeffe, M.; Eddaoudi, M.; Trikalitis, P. N. Reticular Chemistry at Its Best: Directed Assembly of Hexagonal Building Units into the Awaited Metal-Organic Framework with the Intricate Polybenzene Topology, pbz-MOF. *J. Am. Chem. Soc.* **2016**, *138*, 12767–12770.
- (15) Pang, J.; Jiang, F.; Wu, M.; Yuan, D.; Zhou, K.; Qian, J.; Su, K.; Hong, M. Coexistence of cages and one-dimensional channels in a porous MOF with high H<sub>2</sub> and CH<sub>4</sub> uptakes. *Chem. Commun.* **2014**, *50*, 2834–2836.
- (16) Chui, S. S.-Y.; Lo, S. M.-F.; Charmant, J. P. H.; Orpen, G. A.; Williams, I. D. A Chemically Functionalizable Nanoporous Material [Cu<sub>3</sub>(TMA)<sub>2</sub>(H<sub>2</sub>O)<sub>3</sub>]<sub>n</sub>. *Science* **1999**, *283*, 1148–1150.

- (17) Wang, Z.; Zheng, B.; Liu, H.; Yi, P.; Li, X.; Yu, X.; Yun, R. A highly porous 4,4-paddlewheel-connected NbO-type metal-organic framework with a large gas-uptake capacity. *Dalton Trans.* **2013**, *42*, 11304–11311.
- (18) Yan, Y.; Kolokolov, D. I.; da Silva, I.; Stepanov, A. G.; Blake, A. J.; Dailly, A.; Manuel, P.; Tang, C. C.; Yang, S.; Schröder, M. Porous Metal-Organic Polyhedral Frameworks with Optimal Molecular Dynamics and Pore Geometry for Methane Storage. *J. Am. Chem. Soc.* **2017**, *139*, 13349–13360.
- (19) Chen, B.; Ockwig, N. W.; Millward, A. R.; Contreras, D. S.; Yaghi, O. M. High H<sub>2</sub> Adsorption in a Microporous Metal-Organic Framework with Open Metal Sites. *Angew. Chem. Int. Ed.* **2005**, *44*, 4745–4749.
- (20) Lin, X.; Jia, J.; Zhao, X.; Thomas, M.; Blake, A. J.; Walker, G. S.; Champness, N. R.; Hubberstey, P.; Schröder, M. High H<sub>2</sub> Adsorption by Coordination-Framework Materials. *Angew. Chem. Int. Ed.* **2006**, *45*, 7358–7364.
- (21) Lu, Z.; Du, L.; Tang, K.; Bai, J. High H<sub>2</sub> and CH<sub>4</sub> Adsorption Capacity of a Highly Porous (2,3,4)-Connected Metal-Organic Framework. *Cryst. Growth Des.* **2013**, *13*, 2252–2255.
- (22) Zhang, M.; Li, B.; Li, Y.; Wang, Q.; Zhang, W.; Chen, B.; Li, S.; Pan, Y.; You, X.; Bai, J. Finely tuning MOFs towards high performance in C<sub>2</sub>H<sub>2</sub> storage: synthesis and properties of a new MOF-505 analogue with an inserted amide functional group. *Chem. Commun.* **2016**, *52*, 7241–7244.
- (23) Zhang, M.; Chen, C.; Wang, Q.; Fu, W.; Huang, K.; Zhou, W. A metal-organic framework functionalized with piperazine exhibiting enhanced CH<sub>4</sub> storage. *J. Mater. Chem. A* **2017**, *5*, 349–354.
- (24) Zhang, M.; Zhou, W.; Pham, T.; Forrest, K. A.; Liu, W.; He, Y.; Wu, H.; Yildirim, T.; Chen, B.; Space, B.; Pan, Y.; Zaworotko, M. J.; Bai, J. Fine Tuning of MOF-505 Analogues to Reduce Low-Pressure Methane Uptake and Enhance Methane Working Capacity. *Angew. Chem. Int. Ed.* **2017**, *56*, 11426–11430.



- (25) Lin, X.; Telepeni, I.; Blake, A. J.; Dailly, A.; Brown, C. M.; Simmons, J. M.; Zoppi, M.; Walker, G. S.; Thomas, K. M.; Mays, T. J.; Hubberstey, P.; Champness, N. R.; Schröder, M. High Capacity Hydrogen Adsorption in Cu(II) Tetracarboxylate Framework Materials: The Role of Pore Size, Ligand Functionalization, and Exposed Metal Sites. *J. Am. Chem. Soc.* **2009**, *131*, 2159–2171.
- (26) Farha, O. K.; Wilmer, C. E.; Eryazici, I.; Hauser, B. G.; Parilla, P. A.; O'Neill, K.; Sarjeant, A. A.; Nguyen, S. T.; Snurr, R. Q.; Hupp, J. T. Designing Higher Surface Area Metal-Organic Frameworks: Are Triple Bonds Better Than Phenyls? *J. Am. Chem. Soc.* **2012**, *134*, 9860–9863.
- (27) Wilmer, C. E.; Farha, O. K.; Yildirim, T.; Eryazici, I.; Krungleviciute, V.; Sarjeant, A. A.; Snurr, R. Q.; Hupp, J. T. Gram-scale, high-yield synthesis of a robust metal-organic framework for storing methane and other gases. *Energy Environ. Sci.* **2013**, *6*, 1158–1163.
- (28) Kennedy, R. D.; Krungleviciute, V.; Clingerman, D. J.; Mondloch, J. E.; Peng, Y.; Wilmer, C. E.; Sarjeant, A. A.; Snurr, R. Q.; Hupp, J. T.; Yildirim, T.; Farha, O. K.; Mirkin, C. A. Carborane-Based Metal-Organic Framework with High Methane and Hydrogen Storage Capacities. *Chem. Mater.* **2013**, *25*, 3539–3543.
- (29) Barin, G.; Krungleviciute, V.; Gomez-Cualdron, D. A.; Sarjeant, A. A.; Snurr, R. Q.; Hupp, J. T.; Yildirim, T.; Farha, O. K. Isoreticular Series of (3,24)-Connected Metal-Organic Frameworks: Facile Synthesis and High Methane Uptake Properties. *Chem. Mater.* **2014**, *26*, 1912–1917.
- (30) Wang, X.-S.; Ma, S.; Rauch, K.; Simmons, J. M.; Yuan, D.; Wang, X.; Yildirim, T.; Cole, W. C.; López, J. J.; de Meijere, A.; Zhou, H.-C. Metal-Organic Frameworks Based on Double-Bond-Coupled Di-Isophthalate Linkers with High Hydrogen and Methane Uptakes. *Chem. Mater.* **2008**, *20*, 3145–3152.
- (31) Ma, S.; Sun, D.; Simmons, J. M.; Collier, C. D.; Yuan, D.; Zhou, H.-C. Metal-Organic Framework from an Anthracene Derivative Containing Nanoscopic Cages Exhibiting High Methane Uptake. *J. Am. Chem. Soc.* **2008**, *130*, 1012–1016.

- (32) Zhao, D.; Yuan, D.; Sun, D.; Zhou, H.-C. Stabilization of Metal-Organic Frameworks with High Surface Areas by the Incorporation of Mesocavities with Microwindows. *J. Am. Chem. Soc.* **2009**, *131*, 9186–9188.
- (33) Yuan, D.; Zhao, D.; Sun, D.; Zhou, H.-C. An Isoreticular Series of Metal-Organic Frameworks with Dendritic Hexacarboxylate Ligands and Exceptionally High Gas-Uptake Capacity. *Angew. Chem. Int. Ed.* **2010**, *49*, 5357–5361.
- (34) Yan, Y.; Telepeni, I.; Yang, S.; Lin, X.; Kockelmann, W.; Dailly, A.; Blake, A. J.; Lewis, W.; Walker, G. S.; Allan, D. A.; Barnett, S. A.; Champness, N. R.; Schröder, M. Metal-Organic Polyhedral Frameworks: High H<sub>2</sub> Adsorption Capacities and Neutron Powder Diffraction Studies. *J. Am. Chem. Soc.* **2010**, *132*, 4092–4094.
- (35) Farha, O. K.; Yazaydin, O. A.; Eryazici, I.; Malliakas, C. D.; Hauser, B. G.; Kanatzidis, M. G.; Nguyen, S. T.; Snurr, R. Q.; Hupp, J. T. De novo synthesis of a metal-organic framework material featuring ultrahigh surface area and gas storage capacities. *Nat. Chem.* **2010**, *2*, 944–948.
- (36) Guo, Z.; Wu, H.; Srinivas, G.; Zhou, Y.; Xiang, S.; Chen, Z.; Yang, Y.; Zhou, W.; O’Keeffe, M.; Chen, B. A Metal-Organic Framework with Optimized Open Metal Sites and Pore Spaces for High Methane Storage at Room Temperature. *Angew. Chem. Int. Ed.* **2011**, *50*, 3178–3181.
- (37) Xu, G.; Li, B.; Wu, H.; Zhou, W.; Chen, B. Construction of ntt-Type Metal-Organic Framework from C<sub>2</sub>-Symmetry Hexacarboxylate Linker for Enhanced Methane Storage. *Cryst. Growth Des.* **2017**, *17*, 4795–4800.
- (38) Li, B.; Wen, H.-M.; Wang, H.; Wu, H.; Tyagi, M.; Yildirim, T.; Zhou, W.; Chen, B. A Porous Metal-Organic Framework with Dynamic Pyrimidine Groups Exhibiting Record High Methane Storage Working Capacity. *J. Am. Chem. Soc.* **2014**, *136*, 6207–6210.
- (39) Wen, H.-M.; Li, B.; Yuan, D.; Wang, H.; Yildirim, T.; Zhou, W.; Chen, B. A porous metal-organic framework with an elongated anthracene derivative exhibiting a high working capacity for the storage of methane. *J. Mater. Chem. A* **2014**, *2*, 11516–11522.

- (40) Chang, G.; Li, B.; Wang, H.; Bao, Z.; Yildirim, T.; Yao, Z.; Xiang, S.; Chen, B. A microporous metal-organic framework with polarized trifluoromethyl groups for high methane storage. *Chem. Commun.* **2015**, *51*, 14789–14792.
- (41) Wen, H.-M.; Li, B.; Li, L.; Lin, R.-B.; Zhou, W.; Qian, G.; Chen, B. A Metal-Organic Framework with Optimized Porosity and Functional Sites for High Gravimetric and Volumetric Methane Storage Working Capacities. *Adv. Mater.* **2018**, *30*, 1704792.
- (42) Rao, X.; Cai, J.; Yu, J.; He, Y.; Wu, C.; Zhou, W.; Yildirim, T.; Chen, B.; Qian, G. A microporous metal-organic framework with both open metal and Lewis basic pyridyl sites for high C<sub>2</sub>H<sub>2</sub> and CH<sub>4</sub> storage at room temperature. *Chem. Commun.* **2013**, *49*, 6719–6721.
- (43) Cai, J.; Rao, X.; He, Y.; Yu, J.; Wu, C.; Zhou, W.; Yildirim, T.; Chen, B.; Qian, G. A highly porous NbO type metal-organic framework constructed from an expanded tetracarboxylate. *Chem. Commun.* **2014**, *50*, 1552–1554.
- (44) Kong, G.-Q.; Han, Z.-D.; He, Y.; Ou, S.; Zhou, W.; Yildirim, T.; Krishna, R.; Zou, C.; Chen, B.; Wu, C.-D. Expanded Organic Building Units for the Construction of Highly Porous Metal-Organic Frameworks. *Chem.–Eur. J.* **2013**, *19*, 14886–14894.
- (45) Vanduyfhuys, L.; Vandenbrande, S.; Verstraelen, T.; Schmid, R.; Waroquier, M.; Van Speybroeck, V. QuickFF: A Program for a Quick and Easy Derivation of Force Fields for Metal-Organic Frameworks from Ab Initio Input. *J. Comput. Chem.* **2015**, *36*, 1015–1027.
- (46) Vanduyfhuys, L.; Vandenbrande, S.; Wieme, J.; Waroquier, M.; Verstraelen, T.; Van Speybroeck, V. Extension of the QuickFF force field protocol for an improved accuracy of structural, vibrational, mechanical and thermal properties of metal-organic frameworks. *J. Comput. Chem.* **2018**, *39*, 999–1011.
- (47) Frisch, M. J.; Trucks, G. W.; Schlegel, H. B.; Scuseria, G. E.; Robb, M. A.; Cheeseman, J. R.; Scalmani, G.; Barone, V.; Petersson, G. A.; Nakatsuji, H.; Li, X.; Caricato, M.; Marenich, A. V.; Bloino, J.; Janesko, B. G.; Gomperts, R.; Mennucci, B.; Hratchian, H. P.; Ortiz, J. V.; Izmaylov, A. F.; Sonnenberg, J. L.; Williams-Young, D.; Ding, F.; Lipparini, F.; Egidi, F.; Goings, J.; Peng, B.; Petrone, A.; Henderson, T.;

Ranasinghe, D.; Zakrzewski, V. G.; Gao, J.; Rega, N.; Zheng, G.; Liang, W.; Hada, M.; Ehara, M.; Toyota, K.; Fukuda, R.; Hasegawa, J.; Ishida, M.; Nakajima, T.; Honda, Y.; Kitao, O.; Nakai, H.; Vreven, T.; Throssell, K.; Montgomery, J. A., Jr.; Peralta, J. E.; Ogliaro, F.; Bearpark, M. J.; Heyd, J. J.; Brothers, E. N.; Kudin, K. N.; Staroverov, V. N.; Keith, T. A.; Kobayashi, R.; Normand, J.; Raghavachari, K.; Rendell, A. P.; Burant, J. C.; Iyengar, S. S.; Tomasi, J.; Cossi, M.; Millam, J. M.; Klene, M.; Adamo, C.; Cammi, R.; Ochterski, J. W.; Martin, R. L.; Morokuma, K.; Farkas, O.; Foresman, J. B.; Fox, D. J. Gaussian16 Revision E.01. 2016; Gaussian Inc. Wallingford CT.

- (48) Becke, A. D. Density-Functional Thermochemistry. III. The Role of Exact Exchange. *J. Chem. Phys.* **1993**, *98*, 5648–5652.
- (49) Krishnan, R.; Binkley, J. S.; Seeger, R.; Pople, J. A. Self-Consistent Molecular Orbital Methods. 20. Basis Set for Correlated Wave-Functions. *J. Chem. Phys.* **1980**, *72*, 650–654.
- (50) Hay, P. J.; Wadt, W. R. Ab Initio Effective Core Potentials for Molecular Calculations. Potentials for the Transition Metal Atoms Sc to Hg. *J. Chem. Phys.* **1985**, *82*, 270.
- (51) Verstraelen, T.; Vandenbrande, S.; Heidar-Zadeh, F.; Vanduyfhuys, L.; Van Speybroeck, V.; Waroquier, M.; Ayers, P. W. Minimal Basis Iterative Stockholder: Atoms-in-Molecules for Force-Field Development. *J. Chem. Theory Comput.* **2016**, *12*, 3894–3912.
- (52) Perdew, J. P.; Burke, K.; Ernzerhof, M. Generalized Gradient Approximation Made Simple. *Phys. Rev. Lett.* **1996**, *77*, 3865–3868.
- (53) Mortensen, J. J.; Hansen, L. B.; Jacobsen, K. W. Real-Space Grid Implementation of the Projector Augmented Wave Method. *Phys. Rev. B* **2005**, *71*, 035109.
- (54) Allinger, N. L.; Yuh, Y. H.; Lii, J. H. Molecular Mechanics. The MM3 Force Field for Hydrocarbons. 1. *J. Am. Chem. Soc.* **1989**, *111*, 8551–8566.
- (55) Vanduyfhuys, L.; Vandenbrande, S.; Wieme, J.; Waroquier, M.; Verstraelen, T.; Van Speybroeck, V. Extension of the QuickFF Force Field Protocol for an Improved

- Accuracy of Structural, Vibrational, Mechanical and Thermal Properties of Metal-Organic Frameworks. *J. Comput. Chem.* **2018**, *39*, 999–1011.
- (56) Lamaire, A.; Wieme, J.; Rogge, S. M. J.; Waroquier, M.; Van Speybroeck, V. On the Importance of Anharmonicities and Nuclear Quantum Effects in Modelling the Structural Properties and Thermal Expansion in MOF-5. *J. Chem. Phys.* **2019**, *150*, 094503.
- (57) Chen, J.; Martínez, T. J. QTPIE: Charge Transfer with Polarization Current Equalization. A Fluctuating Charge Model with Correct Asymptotics. *Chem. Phys. Lett.* **2007**, *438*, 315–320.
- (58) Lii, J. H.; Allinger, N. L. Molecular Mechanics. The MM3 Force Field for Hydrocarbons. 3. The van der Waals Potentials and Crystal Data for Aliphatic and Aromatic Hydrocarbons. *J. Am. Chem. Soc.* **1989**, *111*, 8576–8582.
- (59) Allinger, N. L.; Zhou, X.; Bergsma, J. Molecular Mechanics Parameters. *J. Mol. Struct.-THEOCHEM* **1994**, *312*, 69–83.
- (60) Sun, H. COMPASS: An ab Initio Force-Field Optimized for Condensed-Phase Applications - Overview with Details on Alkane and Benzene Compounds. *J. Phys. Chem. B* **1998**, *102*, 7338–7364.
